# Supplementary material for: Biosynthetic Gene Content of the ‘Perfume Lichens’ Evernia prunastri and Pseudevernia furfuracea
Source: MDPI journal article supplement (doi:10.3390/molecules24010203), 2019-01-08
Supplement: s1 [file s1]

RAxML tree based on

- the protein sequence of the ketosynthase (KS) domain
- 550 entries (413 sequences from lichen-forming fungi, 131 characterized metabolites from MIBiG, 6 animal fatty acid synthases)

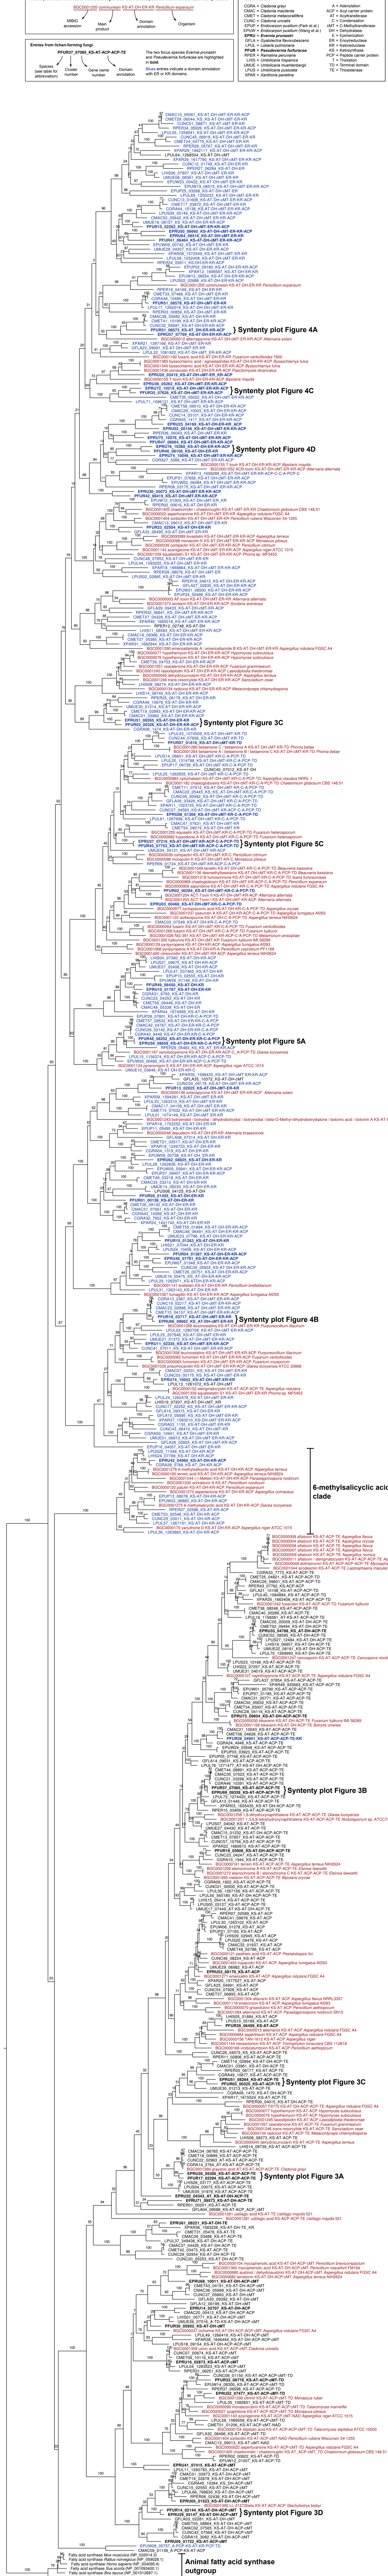

\_\_\_\_\_

1001

outgroup
